# Supplementary material for: Molecular Characteristics, Prognostic Value, and Immune Characteristics of m6A Regulators Identified in Head and Neck Squamous Cell Carcinoma
Source: Front Oncol. 2021 Mar 18;11:629718. doi: 10.3389/fonc.2021.629718 (PMC8014089; doi:10.3389/fonc.2021.629718)
Supplement: Supplementary Table 2 — Correlation of IGF2BP2 expression and clinicopathologic characteristics in HNSCC. [file Table_2.xlsx]

## Sheet: Sheet1
Table S2. Correlation of IGF2BP2 expression and clinicopathologic characteristics in HNSCC
Variables		IGF2BP2		P value
		High (N=222)	Low (N=222)
Gender				0.294143
	FEMALE	55 (24.8%)	66 (29.7%)
	MALE	167 (75.2%)	156 (70.3%)
T				0.0230368
	1	11 (5.0%)	22 (9.9%)
	2	52 (23.4%)	67 (30.2%)
	3	64 (28.8%)	48 (21.6%)
	4	95 (42.8%)	85 (38.3%)
M				0.83361
	0	212 (95.5%)	209 (94.1%)
	1	2 (0.9%)	2 (0.9%)
	4	8 (3.6%)	10 (4.5%)
N				0.619042
	0	109 (49.1%)	113 (50.9%)
	1	37 (16.7%)	37 (16.7%)
	2	63 (28.4%)	60 (27.0%)
	3	4 (1.8%)	2 (0.9%)
	4	9 (4.1%)	10 (4.5%)
Stage				0.649584
	I	10 (4.5%)	17 (7.7%)
	II	35 (15.8%)	35 (15.8%)
	III	45 (20.3%)	36 (16.2%)
	IV	132 (59.5%)	134 (60.4%)
Age				0.532268
	<60	103 (46.4%)	94 (42.3%)
	>=60	119 (53.6%)	128 (57.7%)
Race				0.236746
	WHITE	184 (82.9%)	193 (86.9%)
	BLACK OR AFRICAN AMERICAN	20 (9.0%)	21 (9.5%)
	ASIAN	10 (4.5%)	1 (0.5%)
