# Supplementary material for: Molecular Characteristics, Prognostic Value, and Immune Characteristics of m6A Regulators Identified in Head and Neck Squamous Cell Carcinoma
Source: Front Oncol. 2021 Mar 18;11:629718. doi: 10.3389/fonc.2021.629718 (PMC8014089; doi:10.3389/fonc.2021.629718)
Supplement: Supplementary Table 3 — Correlation of ELVAL1 and LRPPRC expression and clinicopathologic characteristics. [file Table_3.xlsx]

## Sheet: Sheet1
Table S3. Correlation of ELVAL1 and LRPPRC expression and clinicopathologic characteristics
Variables		ELVAL1		P value	Variables		LRPPRC		P value
		High (N=222)	Low (N=223)				High (N=222)	Low (N=223)
Gender				0.105602	Gender				0.0156897
	FEMALE	51 (23.0%)	70 (31.4%)			FEMALE	55 (24.8%)	66 (29.6%)
	MALE	171 (77.0%)	153 (68.6%)			MALE	167 (75.2%)	157 (70.4%)
T				0.753114	T				0.0439628
	1	11 (5.0%)	22 (9.9%)			1	12 (5.4%)	21 (9.4%)
	2	56 (25.2%)	64 (28.7%)			2	51 (23.0%)	69 (30.9%)
	3	59 (26.6%)	53 (23.8%)			3	66 (29.7%)	46 (20.6%)
	4	96 (43.2%)	84 (37.7%)			4	93 (41.9%)	87 (39.0%)
M				0.97324	M				0.98662
	0	211 (95.0%)	211 (94.6%)			0	209 (94.1%)	213 (95.5%)
	1	0 (0%)	4 (1.8%)			1	3 (1.4%)	1 (0.4%)
	4	11 (5.0%)	7 (3.1%)			4	10 (4.5%)	8 (3.6%)
N				0.79959	N				0.430179
	0	113 (50.9%)	110 (49.3%)			0	106 (47.7%)	117 (52.5%)
	1	33 (14.9%)	41 (18.4%)			1	40 (18.0%)	34 (15.2%)
	2	66 (29.7%)	57 (25.6%)			2	62 (27.9%)	61 (27.4%)
	3	3 (1.4%)	3 (1.3%)			3	3 (1.4%)	3 (1.3%)
	4	7 (3.2%)	12 (5.4%)			4	11 (5.0%)	8 (3.6%)
Stage				0.474424	Stage				0.124822
	I	10 (4.5%)	17 (7.6%)			I	13 (5.9%)	14 (6.3%)
	II	35 (15.8%)	36 (16.1%)			II	31 (14.0%)	40 (17.9%)
	III	37 (16.7%)	44 (19.7%)			III	42 (18.9%)	39 (17.5%)
	IV	140 (63.1%)	126 (56.5%)			IV	136 (61.3%)	130 (58.3%)
Age				0.829896	Age				0.539995
	<60	103 (46.4%)	94 (42.2%)			<60	98 (44.1%)	99 (44.4%)
	>=60	119 (53.6%)	128 (57.4%)			>=60	124 (55.9%)	123 (55.2%)
Race				0.0137929	Race				0.0403475
	WHITE	185 (83.3%)	192 (86.1%)			WHITE	183 (82.4%)	194 (87.0%)
	BLACK OR AFRICAN AMERICAN	28 (12.6%)	13 (5.8%)			BLACK OR AFRICAN AMERICAN	29 (13.1%)	12 (5.4%)
	ASIAN	4 (1.8%)	7 (3.1%)			ASIAN	3 (1.4%)	8 (3.6%)
